# Supplementary material for: Genetic Signatures for Distinguishing Chemo-Sensitive from Chemo-Resistant Responders in Prostate Cancer Patients
Source: MDPI journal article supplement (doi:10.3390/cimb46030145), 2024-03-11
Supplement: s1 [file s1]

Table S1

| ITEM TO CHECK                                                        | IMPORTANCE | Comments                                                                                                                                                                                                                                                                                                                                                                                                                                                                                                                                                                                                                                                                                                                                                                                                                                                                                                                                                                                                                                                                                                                                                                                                                                                                             |
|----------------------------------------------------------------------|------------|--------------------------------------------------------------------------------------------------------------------------------------------------------------------------------------------------------------------------------------------------------------------------------------------------------------------------------------------------------------------------------------------------------------------------------------------------------------------------------------------------------------------------------------------------------------------------------------------------------------------------------------------------------------------------------------------------------------------------------------------------------------------------------------------------------------------------------------------------------------------------------------------------------------------------------------------------------------------------------------------------------------------------------------------------------------------------------------------------------------------------------------------------------------------------------------------------------------------------------------------------------------------------------------|
| <b>EXPERIMENTAL DESIGN</b>                                           |            |                                                                                                                                                                                                                                                                                                                                                                                                                                                                                                                                                                                                                                                                                                                                                                                                                                                                                                                                                                                                                                                                                                                                                                                                                                                                                      |
| Definition of experimental and control groups                        | E          | Table 1                                                                                                                                                                                                                                                                                                                                                                                                                                                                                                                                                                                                                                                                                                                                                                                                                                                                                                                                                                                                                                                                                                                                                                                                                                                                              |
| Number within each group                                             | E          | 4 Good responders & 5 Poor responders. Each patient with both normal and tumour tissue.                                                                                                                                                                                                                                                                                                                                                                                                                                                                                                                                                                                                                                                                                                                                                                                                                                                                                                                                                                                                                                                                                                                                                                                              |
| Assay carried out by core lab or investigator's lab?                 | D          | Core lab                                                                                                                                                                                                                                                                                                                                                                                                                                                                                                                                                                                                                                                                                                                                                                                                                                                                                                                                                                                                                                                                                                                                                                                                                                                                             |
| <b>SAMPLE</b>                                                        |            |                                                                                                                                                                                                                                                                                                                                                                                                                                                                                                                                                                                                                                                                                                                                                                                                                                                                                                                                                                                                                                                                                                                                                                                                                                                                                      |
| Description                                                          | E          | FFPE tissues                                                                                                                                                                                                                                                                                                                                                                                                                                                                                                                                                                                                                                                                                                                                                                                                                                                                                                                                                                                                                                                                                                                                                                                                                                                                         |
| Volume/mass of sample processed                                      | D          | 10 to 30µm                                                                                                                                                                                                                                                                                                                                                                                                                                                                                                                                                                                                                                                                                                                                                                                                                                                                                                                                                                                                                                                                                                                                                                                                                                                                           |
| Microdissection or macrodissection                                   | E          | microdissection                                                                                                                                                                                                                                                                                                                                                                                                                                                                                                                                                                                                                                                                                                                                                                                                                                                                                                                                                                                                                                                                                                                                                                                                                                                                      |
| Processing procedure                                                 | E          | Materials and Methods                                                                                                                                                                                                                                                                                                                                                                                                                                                                                                                                                                                                                                                                                                                                                                                                                                                                                                                                                                                                                                                                                                                                                                                                                                                                |
| Sample storage conditions and duration (especially for FFPE samples) | E          | Stored at Room Temperature                                                                                                                                                                                                                                                                                                                                                                                                                                                                                                                                                                                                                                                                                                                                                                                                                                                                                                                                                                                                                                                                                                                                                                                                                                                           |
| <b>NUCLEIC ACID EXTRACTION</b>                                       |            |                                                                                                                                                                                                                                                                                                                                                                                                                                                                                                                                                                                                                                                                                                                                                                                                                                                                                                                                                                                                                                                                                                                                                                                                                                                                                      |
| Procedure and/or instrumentation                                     | E          | Materials and Methods                                                                                                                                                                                                                                                                                                                                                                                                                                                                                                                                                                                                                                                                                                                                                                                                                                                                                                                                                                                                                                                                                                                                                                                                                                                                |
| Name of kit and details of any modifications                         | E          | Quick-DNA/RNA™ FFPE Kit (Zymo Research)                                                                                                                                                                                                                                                                                                                                                                                                                                                                                                                                                                                                                                                                                                                                                                                                                                                                                                                                                                                                                                                                                                                                                                                                                                              |
| Details of DNase or RNase treatment                                  | E          | on-column DNase I treatment (Quick-DNA/RNA™ FFPE Kit)                                                                                                                                                                                                                                                                                                                                                                                                                                                                                                                                                                                                                                                                                                                                                                                                                                                                                                                                                                                                                                                                                                                                                                                                                                |
| Contamination assessment (DNA or RNA)                                | E          | DNA contamination assessed by qPCR without RT step.                                                                                                                                                                                                                                                                                                                                                                                                                                                                                                                                                                                                                                                                                                                                                                                                                                                                                                                                                                                                                                                                                                                                                                                                                                  |
| Nucleic acid quantification                                          | E          | Qubit RNA High Sensitivity Kit                                                                                                                                                                                                                                                                                                                                                                                                                                                                                                                                                                                                                                                                                                                                                                                                                                                                                                                                                                                                                                                                                                                                                                                                                                                       |
| Instrument and method                                                | E          | Qubit 4 Fluorometer                                                                                                                                                                                                                                                                                                                                                                                                                                                                                                                                                                                                                                                                                                                                                                                                                                                                                                                                                                                                                                                                                                                                                                                                                                                                  |
| Purity (A260/A280)                                                   | D          | Assessed by NanoDrop 8000 spectrophotometer                                                                                                                                                                                                                                                                                                                                                                                                                                                                                                                                                                                                                                                                                                                                                                                                                                                                                                                                                                                                                                                                                                                                                                                                                                          |
| RNA integrity method/instrument                                      | E          | Agilent High Sensitivity ScreenTape and 4200 TapeStation System                                                                                                                                                                                                                                                                                                                                                                                                                                                                                                                                                                                                                                                                                                                                                                                                                                                                                                                                                                                                                                                                                                                                                                                                                      |
| RIN/RQI or Cq of 3' and 5' transcripts                               | E          | RIN values of RNA samples and Cq values of 3' and 5' transcripts detailed in Table S1                                                                                                                                                                                                                                                                                                                                                                                                                                                                                                                                                                                                                                                                                                                                                                                                                                                                                                                                                                                                                                                                                                                                                                                                |
| Inhibition testing (Cq dilutions, spike or other)                    | E          | Inhibition assessed by SPUD qPCR assay, Table S2                                                                                                                                                                                                                                                                                                                                                                                                                                                                                                                                                                                                                                                                                                                                                                                                                                                                                                                                                                                                                                                                                                                                                                                                                                     |
| <b>REVERSE TRANSCRIPTION</b>                                         |            |                                                                                                                                                                                                                                                                                                                                                                                                                                                                                                                                                                                                                                                                                                                                                                                                                                                                                                                                                                                                                                                                                                                                                                                                                                                                                      |
|                                                                      |            | cDNA was synthesized from FFPE total RNA using the Maxima H Minus cDNA Synthesis MasterMix with dsDNase Kit (Thermo Fisher) according to the manufacturer's protocol. All samples were prepared in 200 µL PCR-strip tubes. Approximately 100 ng of RNA was mixed with 1 µL of 10x dsDNase Buffer and 1 µL of dsDNase and diluted up to 10 µL with Nuclease-free water. Each sample was mixed gently and centrifuged briefly. All samples were then incubated in the Applied Biosystems 2720 Thermal Cycler (Thermo Fisher) at 37 °C for 2 min and stored on ice. Each dsDNase-treated RNA sample was then mixed with 4 µL of 5x Maxima cDNA H Minus Synthesis MasterMix and 6 µL of Nuclease-free water and incubated in a Applied Biosystems 2720 Thermal Cycler (Thermo Fisher) at the following settings: 10 min at 25 °C for priming, 15 min at 50 °C for reverse transcription to occur, 5 min at 85 °C for inactivation of reverse transcriptase. No-RT control samples were created at the same time in which RNA from the each FFPE sample was mixed with Maxima No RT Control mastermix containing no Maxima H Minus Reverse Transcriptase. A No template control (NTC) reaction was also included in which reverse transcription was carried out without any RNA template. |
| Complete reaction conditions                                         | E          |                                                                                                                                                                                                                                                                                                                                                                                                                                                                                                                                                                                                                                                                                                                                                                                                                                                                                                                                                                                                                                                                                                                                                                                                                                                                                      |
| Amount of RNA and reaction volume                                    | E          | 100 ng of RNA in a 20 µL of volume per sample.                                                                                                                                                                                                                                                                                                                                                                                                                                                                                                                                                                                                                                                                                                                                                                                                                                                                                                                                                                                                                                                                                                                                                                                                                                       |
| Priming oligonucleotide (if using GSP) and concentration             | E          | No GSP was used. The Maxima H Minus cDNA Synthesis Master Mix used in this study contains oligo(dT) and random hexamers for priming cDNA synthesis.                                                                                                                                                                                                                                                                                                                                                                                                                                                                                                                                                                                                                                                                                                                                                                                                                                                                                                                                                                                                                                                                                                                                  |
| Reverse transcriptase and concentration                              | E          | Maxima H Minus cDNA Synthesis MasterMix with dsDNase Kit (Thermo Fisher)                                                                                                                                                                                                                                                                                                                                                                                                                                                                                                                                                                                                                                                                                                                                                                                                                                                                                                                                                                                                                                                                                                                                                                                                             |
| Temperature and time                                                 | E          | Specified in 'Complete reaction conditions'                                                                                                                                                                                                                                                                                                                                                                                                                                                                                                                                                                                                                                                                                                                                                                                                                                                                                                                                                                                                                                                                                                                                                                                                                                          |
| Manufacturer of reagents and catalogue numbers                       | D          |                                                                                                                                                                                                                                                                                                                                                                                                                                                                                                                                                                                                                                                                                                                                                                                                                                                                                                                                                                                                                                                                                                                                                                                                                                                                                      |
| Cqs with and without RT                                              | D*         | In all experiments, no Cq values were obtained for samples without RT compared to samples with RT.                                                                                                                                                                                                                                                                                                                                                                                                                                                                                                                                                                                                                                                                                                                                                                                                                                                                                                                                                                                                                                                                                                                                                                                   |
| Storage conditions of cDNA                                           | D          | All cDNA samples were stored at -20 °C.                                                                                                                                                                                                                                                                                                                                                                                                                                                                                                                                                                                                                                                                                                                                                                                                                                                                                                                                                                                                                                                                                                                                                                                                                                              |
| <b>qPCR TARGET INFORMATION</b>                                       |            |                                                                                                                                                                                                                                                                                                                                                                                                                                                                                                                                                                                                                                                                                                                                                                                                                                                                                                                                                                                                                                                                                                                                                                                                                                                                                      |
| If multiplex, efficiency and LOD of each assay.                      | E          | Not Applicable                                                                                                                                                                                                                                                                                                                                                                                                                                                                                                                                                                                                                                                                                                                                                                                                                                                                                                                                                                                                                                                                                                                                                                                                                                                                       |
| Sequence accession number                                            | E          | ABCBI: NM_001348945.2; CYP1B: NM_000104.4                                                                                                                                                                                                                                                                                                                                                                                                                                                                                                                                                                                                                                                                                                                                                                                                                                                                                                                                                                                                                                                                                                                                                                                                                                            |
| Location of amplicon                                                 | D          |                                                                                                                                                                                                                                                                                                                                                                                                                                                                                                                                                                                                                                                                                                                                                                                                                                                                                                                                                                                                                                                                                                                                                                                                                                                                                      |
| Amplicon length                                                      | E          | Table 2                                                                                                                                                                                                                                                                                                                                                                                                                                                                                                                                                                                                                                                                                                                                                                                                                                                                                                                                                                                                                                                                                                                                                                                                                                                                              |
| <i>In silico</i> specificity screen (BLAST, etc)                     | E          | Primer specificity confirmed b Primer-BLAST                                                                                                                                                                                                                                                                                                                                                                                                                                                                                                                                                                                                                                                                                                                                                                                                                                                                                                                                                                                                                                                                                                                                                                                                                                          |
| Pseudogenes, retropseudogenes or other homologs?                     | D          |                                                                                                                                                                                                                                                                                                                                                                                                                                                                                                                                                                                                                                                                                                                                                                                                                                                                                                                                                                                                                                                                                                                                                                                                                                                                                      |
| Sequence alignment                                                   | D          |                                                                                                                                                                                                                                                                                                                                                                                                                                                                                                                                                                                                                                                                                                                                                                                                                                                                                                                                                                                                                                                                                                                                                                                                                                                                                      |
| Secondary structure analysis of amplicon                             | D          |                                                                                                                                                                                                                                                                                                                                                                                                                                                                                                                                                                                                                                                                                                                                                                                                                                                                                                                                                                                                                                                                                                                                                                                                                                                                                      |
| Location of each primer by exon or intron (if applicable)            | E          | Not Applicable                                                                                                                                                                                                                                                                                                                                                                                                                                                                                                                                                                                                                                                                                                                                                                                                                                                                                                                                                                                                                                                                                                                                                                                                                                                                       |
| What splice variants are targeted?                                   | E          | No splice variants were targeted.                                                                                                                                                                                                                                                                                                                                                                                                                                                                                                                                                                                                                                                                                                                                                                                                                                                                                                                                                                                                                                                                                                                                                                                                                                                    |
| <b>qPCR OLIGONUCLEOTIDES</b>                                         |            |                                                                                                                                                                                                                                                                                                                                                                                                                                                                                                                                                                                                                                                                                                                                                                                                                                                                                                                                                                                                                                                                                                                                                                                                                                                                                      |
| Primer sequences                                                     | E          | Table 2                                                                                                                                                                                                                                                                                                                                                                                                                                                                                                                                                                                                                                                                                                                                                                                                                                                                                                                                                                                                                                                                                                                                                                                                                                                                              |
| Probe sequences                                                      | D**        | Not Applicable                                                                                                                                                                                                                                                                                                                                                                                                                                                                                                                                                                                                                                                                                                                                                                                                                                                                                                                                                                                                                                                                                                                                                                                                                                                                       |
| Location and identity of any modifications                           | E          | None                                                                                                                                                                                                                                                                                                                                                                                                                                                                                                                                                                                                                                                                                                                                                                                                                                                                                                                                                                                                                                                                                                                                                                                                                                                                                 |
| Manufacturer of oligonucleotides                                     | D          | Integrated DNA Technologies                                                                                                                                                                                                                                                                                                                                                                                                                                                                                                                                                                                                                                                                                                                                                                                                                                                                                                                                                                                                                                                                                                                                                                                                                                                          |
| Purification method                                                  | D          | Standard Desalting                                                                                                                                                                                                                                                                                                                                                                                                                                                                                                                                                                                                                                                                                                                                                                                                                                                                                                                                                                                                                                                                                                                                                                                                                                                                   |

| qPCR PROTOCOL                                         |   |                                                                                                                                                                                                                                                                                                                                                                                                                                                                                                                                                                                                                                                                                                                                                                                                                                                                                                                                                                                                                                                                                                                                                           |
|-------------------------------------------------------|---|-----------------------------------------------------------------------------------------------------------------------------------------------------------------------------------------------------------------------------------------------------------------------------------------------------------------------------------------------------------------------------------------------------------------------------------------------------------------------------------------------------------------------------------------------------------------------------------------------------------------------------------------------------------------------------------------------------------------------------------------------------------------------------------------------------------------------------------------------------------------------------------------------------------------------------------------------------------------------------------------------------------------------------------------------------------------------------------------------------------------------------------------------------------|
|                                                       |   | <p>qPCR was performed in a total reaction volume of 10 µL consisting of 2 µL diluted preamplified cDNA as template, 5µL of 2x PowerUp SYBR Green I Mastermix (Thermo Fisher), and both the forward and reverse primers to a final concentration of 500 nM. NTC reactions were included in all assays as negative controls. Each reaction was run in triplicate. Reactions were performed on the QuantStudio 12K Flex Real-Time PCR System (Applied Biosystems) using the following cycling parameters: 50°C for 2 min; initial denaturation at 95°C for 2 min followed by 40 cycles of 95°C for 15 secs and 57°C for 1 min. A melt curve analysis was performed on all reactions at the end of the PCR run using default parameters. Amplification data were analyzed with Life Technologies QuantStudio 12K Flex Software v1.2.4, applying user-defined thresholds to obtain Cq-values. Outliers in technical replicate reactions, reactions that showed no amplification and reactions that showed multiple Tm peaks during melt curve analysis were removed from analysis. Data was finally exported into Excel spreadsheets for further analysis.</p> |
| Complete reaction conditions                          | E |                                                                                                                                                                                                                                                                                                                                                                                                                                                                                                                                                                                                                                                                                                                                                                                                                                                                                                                                                                                                                                                                                                                                                           |
| Reaction volume and amount of cDNA/DNA                | E | 10 µL reaction with 2 µL diluted preamplified cDNA                                                                                                                                                                                                                                                                                                                                                                                                                                                                                                                                                                                                                                                                                                                                                                                                                                                                                                                                                                                                                                                                                                        |
| Primer, (probe), Mg++ and dNTP concentrations         | E | 500 nM each primer with PowerUp SYBR Green Master Mix (Thermo Fisher)                                                                                                                                                                                                                                                                                                                                                                                                                                                                                                                                                                                                                                                                                                                                                                                                                                                                                                                                                                                                                                                                                     |
| Polymerase identity and concentration                 | E | PowerUp SYBR Green Master Mix (Thermo Fisher)                                                                                                                                                                                                                                                                                                                                                                                                                                                                                                                                                                                                                                                                                                                                                                                                                                                                                                                                                                                                                                                                                                             |
| Buffer/kit identity and manufacturer                  | E | PowerUp SYBR Green Master Mix (Thermo Fisher)                                                                                                                                                                                                                                                                                                                                                                                                                                                                                                                                                                                                                                                                                                                                                                                                                                                                                                                                                                                                                                                                                                             |
| Exact chemical constitution of the buffer             | D | PowerUp SYBR Green Master Mix (Thermo Fisher)                                                                                                                                                                                                                                                                                                                                                                                                                                                                                                                                                                                                                                                                                                                                                                                                                                                                                                                                                                                                                                                                                                             |
| Additives (SYBR Green I, DMSO, etc.)                  | E | PowerUp SYBR Green Master Mix (Thermo Fisher)                                                                                                                                                                                                                                                                                                                                                                                                                                                                                                                                                                                                                                                                                                                                                                                                                                                                                                                                                                                                                                                                                                             |
| Manufacturer of plates/tubes and catalog number       | D | MicroAmp™ Optical 384-Well Reaction Plate with Barcode, Catalog number: 4326270                                                                                                                                                                                                                                                                                                                                                                                                                                                                                                                                                                                                                                                                                                                                                                                                                                                                                                                                                                                                                                                                           |
| Complete thermocycling parameters                     | E | See 'Complete reaction conditions'                                                                                                                                                                                                                                                                                                                                                                                                                                                                                                                                                                                                                                                                                                                                                                                                                                                                                                                                                                                                                                                                                                                        |
| Reaction setup (manual/robotic)                       | D | Manual                                                                                                                                                                                                                                                                                                                                                                                                                                                                                                                                                                                                                                                                                                                                                                                                                                                                                                                                                                                                                                                                                                                                                    |
| Manufacturer of qPCR instrument                       | E | Applied Biosystems QuantStudio™ 12K Flex thermocycler                                                                                                                                                                                                                                                                                                                                                                                                                                                                                                                                                                                                                                                                                                                                                                                                                                                                                                                                                                                                                                                                                                     |
| qPCR VALIDATION                                       |   |                                                                                                                                                                                                                                                                                                                                                                                                                                                                                                                                                                                                                                                                                                                                                                                                                                                                                                                                                                                                                                                                                                                                                           |
| Specificity (gel, sequence, melt, or digest)          | E | Confirmed by melt curve analysis (single peak) for each primer set and gel electrophoresis                                                                                                                                                                                                                                                                                                                                                                                                                                                                                                                                                                                                                                                                                                                                                                                                                                                                                                                                                                                                                                                                |
| For SYBR Green I, Cq of the NTC                       | E | Cq of NTC was 'undetermined'                                                                                                                                                                                                                                                                                                                                                                                                                                                                                                                                                                                                                                                                                                                                                                                                                                                                                                                                                                                                                                                                                                                              |
| Standard curves with slope and y-intercept            | E | Available on request                                                                                                                                                                                                                                                                                                                                                                                                                                                                                                                                                                                                                                                                                                                                                                                                                                                                                                                                                                                                                                                                                                                                      |
| PCR efficiency calculated from slope                  | E | ABCB1, E= 98.4%; CYP1B: E= 108.1%; GAPDH, E= 99.7%; HPRT, E=92.9%; HSPCB, E=103.9%                                                                                                                                                                                                                                                                                                                                                                                                                                                                                                                                                                                                                                                                                                                                                                                                                                                                                                                                                                                                                                                                        |
| r2 of standard curve                                  | E | > 0,98 for all assays                                                                                                                                                                                                                                                                                                                                                                                                                                                                                                                                                                                                                                                                                                                                                                                                                                                                                                                                                                                                                                                                                                                                     |
| DATA ANALYSIS                                         |   |                                                                                                                                                                                                                                                                                                                                                                                                                                                                                                                                                                                                                                                                                                                                                                                                                                                                                                                                                                                                                                                                                                                                                           |
| qPCR analysis program (source, version)               | E | QuantStudio™ 12K Flex Software 1.5                                                                                                                                                                                                                                                                                                                                                                                                                                                                                                                                                                                                                                                                                                                                                                                                                                                                                                                                                                                                                                                                                                                        |
| Cq method determination                               | E | Automatic baseline setting and manual threshold setting                                                                                                                                                                                                                                                                                                                                                                                                                                                                                                                                                                                                                                                                                                                                                                                                                                                                                                                                                                                                                                                                                                   |
| Outlier identification and disposition                | E | A Cq value was discarded if the melt curve was inconsistent with other samples in the experiment.                                                                                                                                                                                                                                                                                                                                                                                                                                                                                                                                                                                                                                                                                                                                                                                                                                                                                                                                                                                                                                                         |
| Results of NTCs                                       | E | No Cq values were assigned to NTC for all assays except for HSPCB where Cq for NTC was > 10 cycles away from the experimental samples                                                                                                                                                                                                                                                                                                                                                                                                                                                                                                                                                                                                                                                                                                                                                                                                                                                                                                                                                                                                                     |
| Justification of number and choice of reference genes | E | The stability of three reference genes: GAPDH, HPRT and HSPCB was evaluated using Reffinder. Both GAPDH and HSPCB were used to normalized the qPCR data.                                                                                                                                                                                                                                                                                                                                                                                                                                                                                                                                                                                                                                                                                                                                                                                                                                                                                                                                                                                                  |
| Description of normalisation method                   | E | qPCR data were analyzed in Microsoft Excel using both GAPDH and HSPCB as normalization controls and the Pfaffl (Pfaffl, 2001) method to calculate relative expression.                                                                                                                                                                                                                                                                                                                                                                                                                                                                                                                                                                                                                                                                                                                                                                                                                                                                                                                                                                                    |
| Number and stage (RT or qPCR) of technical replicates | E | 3 technical qPCR replicates                                                                                                                                                                                                                                                                                                                                                                                                                                                                                                                                                                                                                                                                                                                                                                                                                                                                                                                                                                                                                                                                                                                               |
| Repeatability (intra-assay variation)                 | E | Standard deviation of triplicates < 0.5                                                                                                                                                                                                                                                                                                                                                                                                                                                                                                                                                                                                                                                                                                                                                                                                                                                                                                                                                                                                                                                                                                                   |
| Statistical methods for result significance           | E | A significance level of p<0.05 was used                                                                                                                                                                                                                                                                                                                                                                                                                                                                                                                                                                                                                                                                                                                                                                                                                                                                                                                                                                                                                                                                                                                   |
| Software (source, version)                            | E | Microsoft Excel, SAS Version 9.2                                                                                                                                                                                                                                                                                                                                                                                                                                                                                                                                                                                                                                                                                                                                                                                                                                                                                                                                                                                                                                                                                                                          |

**Table.S2. Primer nucleotide sequences and product lengths for the target and reference genes amplification by qPCR**

| Gene Symbol | Primer Name                | Primer Sequence (5'----- 3')                                          | Ampl icon Size | Reference               |
|-------------|----------------------------|-----------------------------------------------------------------------|----------------|-------------------------|
| ABCB 1      | 3-abcb1Fp1<br>3-abcb1Rp1   | GGA CTG TAA CTG ACT GCC TTG<br>C<br>GGC AGT TTG GAC AAG ATG ACT<br>CC | 124 bp         | This study              |
| CYP1B 1     | CYP1B1pp3 F<br>CYP1B1pp3 R | GCTGCAGTGGCTGCTCCT<br>CCCACGACCTGATCCAATTCT                           | 81 bp          | (Finnström et al. 2001) |
| GAPD H      | 3-GAPDHFp<br>3-GAPDHRp     | AGT CCC TGC CAC ACT CAG<br>TAC TTT ATT GAT GGT ACA TGA<br>CAA GG      | 123 bp         | (Nolan et al. 2006)     |
| HPRT 1      | HPRT1F<br>HPRT1R           | GAC CAG TCA ACA GGG GAC AT<br>CCT GAC CAA GGA AAG CAA AG              | 132 bp         | (Liu et al. 2015)       |
| HSPC B      | HSPCBF<br>HSPCBR           | TCT GGG TAT CGG AAA GCA<br>AGC C<br>GTG CAC TTC CTC AGG CAT CTT<br>G  | 80 bp          | (Jacob et al. 2013)     |

**Table. S3:** Molecular function and network analysis following gene enrichment.

| <b>Molecular function and pathways</b>                      | <b>Library</b>         | <b>p-value</b> | <b>q-value</b> | <b>z-score</b> | <b>Combined score</b> |
|-------------------------------------------------------------|------------------------|----------------|----------------|----------------|-----------------------|
| MicroRNAs in cancer                                         | KEGG_2021_Human        | 0.0002395      | 0.002155       | 39380          | 328300                |
| Nuclear Receptors Meta-Pathway WP2882                       | WikiPathway_2021_Human | 0.0002536      | 0.004599       | 39362          | 325900                |
| Sulindac Metabolic Pathway WP2542                           | WikiPathway_2021_Human | 0.0004999      | 0.004599       | 4999           | 37990                 |
| PMC5346035 Nihms844046F1                                    | PFOCR_Pathways         | 0.0004999      | 0.002168       | 4999           | 37990                 |
| PMC4844852 Nihms-744712-F0001                               | PFOCR_Pathways         | 0.0004999      | 0.002168       | 4999           | 37990                 |
| PMC7235470 RMV-30-e2109-g001                                | PFOCR_Pathways         | 0.0004999      | 0.002168       | 4999           | 37990                 |
| PMC5953846 Nihms963973F8                                    | PFOCR_Pathways         | 0.0004999      | 0.002168       | 4999           | 37990                 |
| PMC5896366                                                  |                        |                |                |                |                       |
| Dmd.118.080663F2                                            | PFOCR_Pathways         | 0.0004999      | 0.002168       | 4999           | 37990                 |
| LncRNA-mediated mechanisms of therapeutic resistance WP3672 | WikiPathway_2021_Human | 0.0005999      | 0.004599       | 3999           | 29660                 |
| Benzo(a)pyrene metabolism WP696                             | WikiPathway_2021_Human | 0.0008998      | 0.004827       | 2499           | 17520                 |
| Estrogen Receptor Pathway WP2881                            | WikiPathway_2021_Human | 0.0013         | 0.004827       | 1666           | 11070                 |
| Tryptophan metabolism                                       | KEGG_2021_Human        | 0.004196       | 0.01096        | 486.8          | 2664                  |
| ABC transporters                                            | KEGG_2021_Human        | 0.004495       | 0.01096        | 453.5          | 2451                  |
| Ovarian steroidogenesis                                     | KEGG_2021_Human        | 0.005094       | 0.01096        | 399            | 2106                  |
| Steroid hormone biosynthesis                                | KEGG_2021_Human        | 0.006091       | 0.01096        | 332.3          | 1695                  |
